# Supplementary material for: Assessment of Contemporary Satellite Sea Ice Thickness Products for Arctic Sea Ice
Source: Copernicus journal article supplement (doi:10.5194/tc-2018-197), 2018-09-24
Supplement: Supplementary file 1 [file tc-2018-197-supplement.pdf]

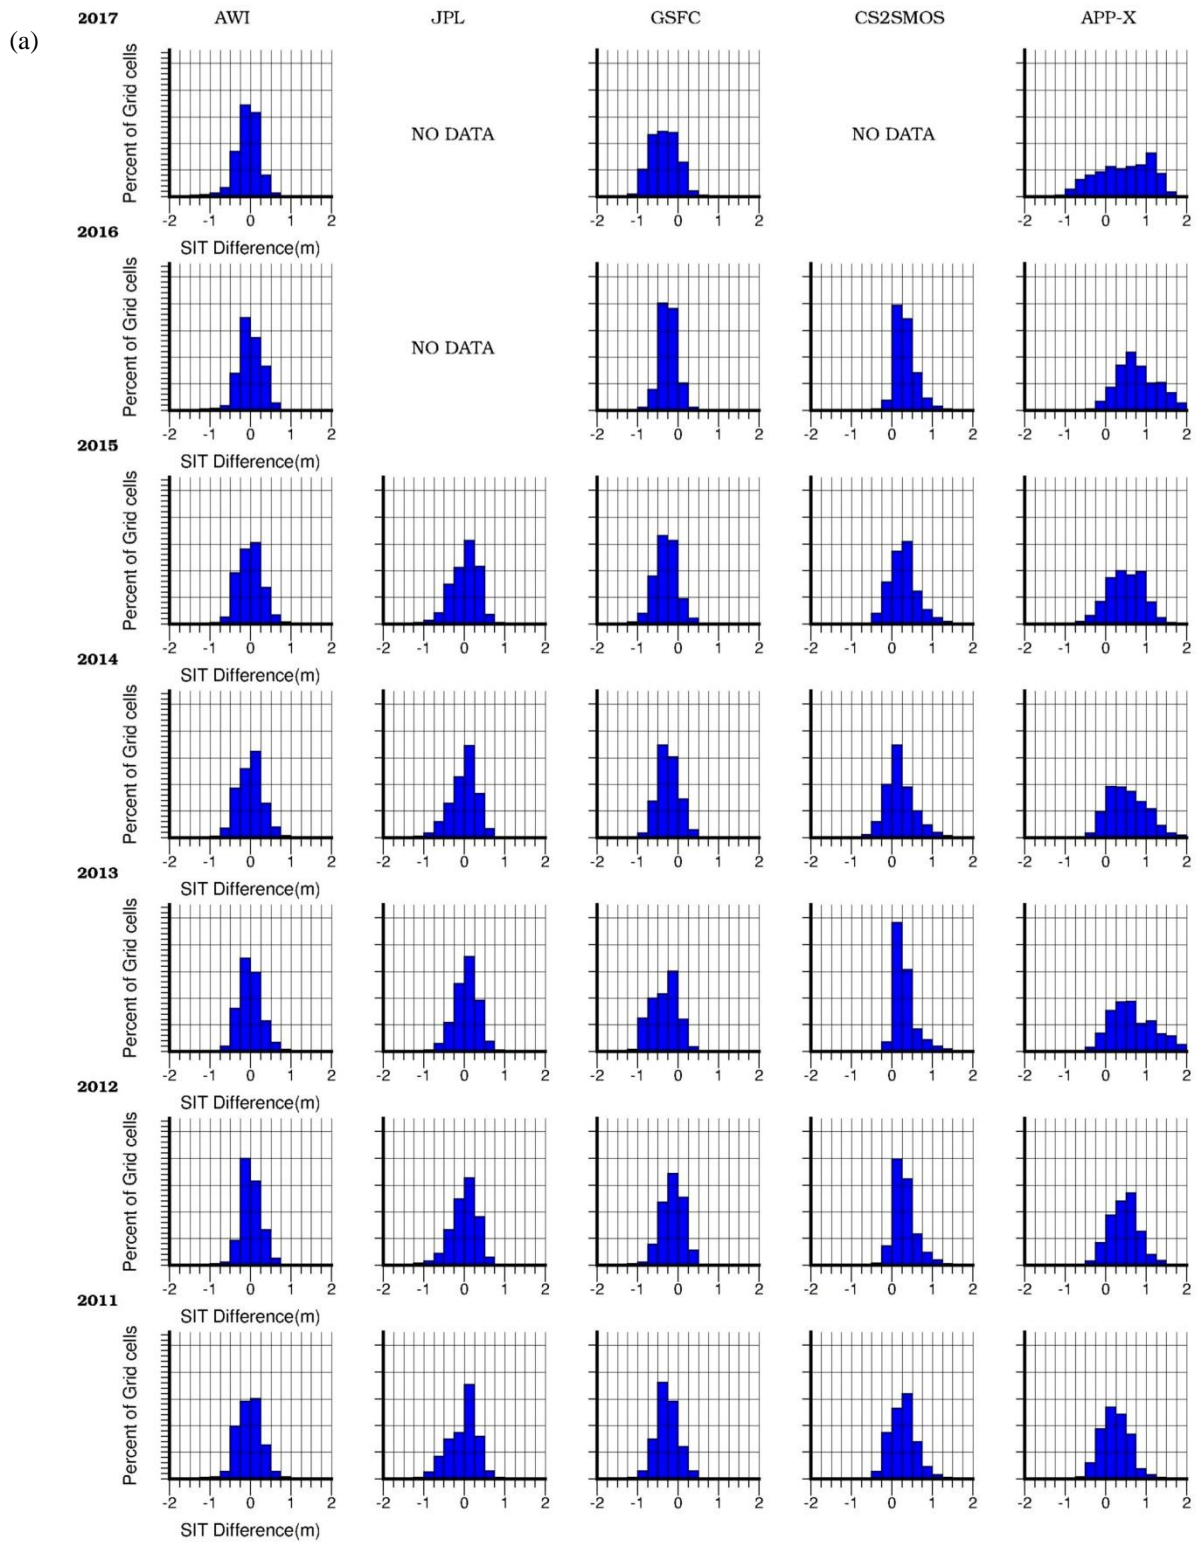

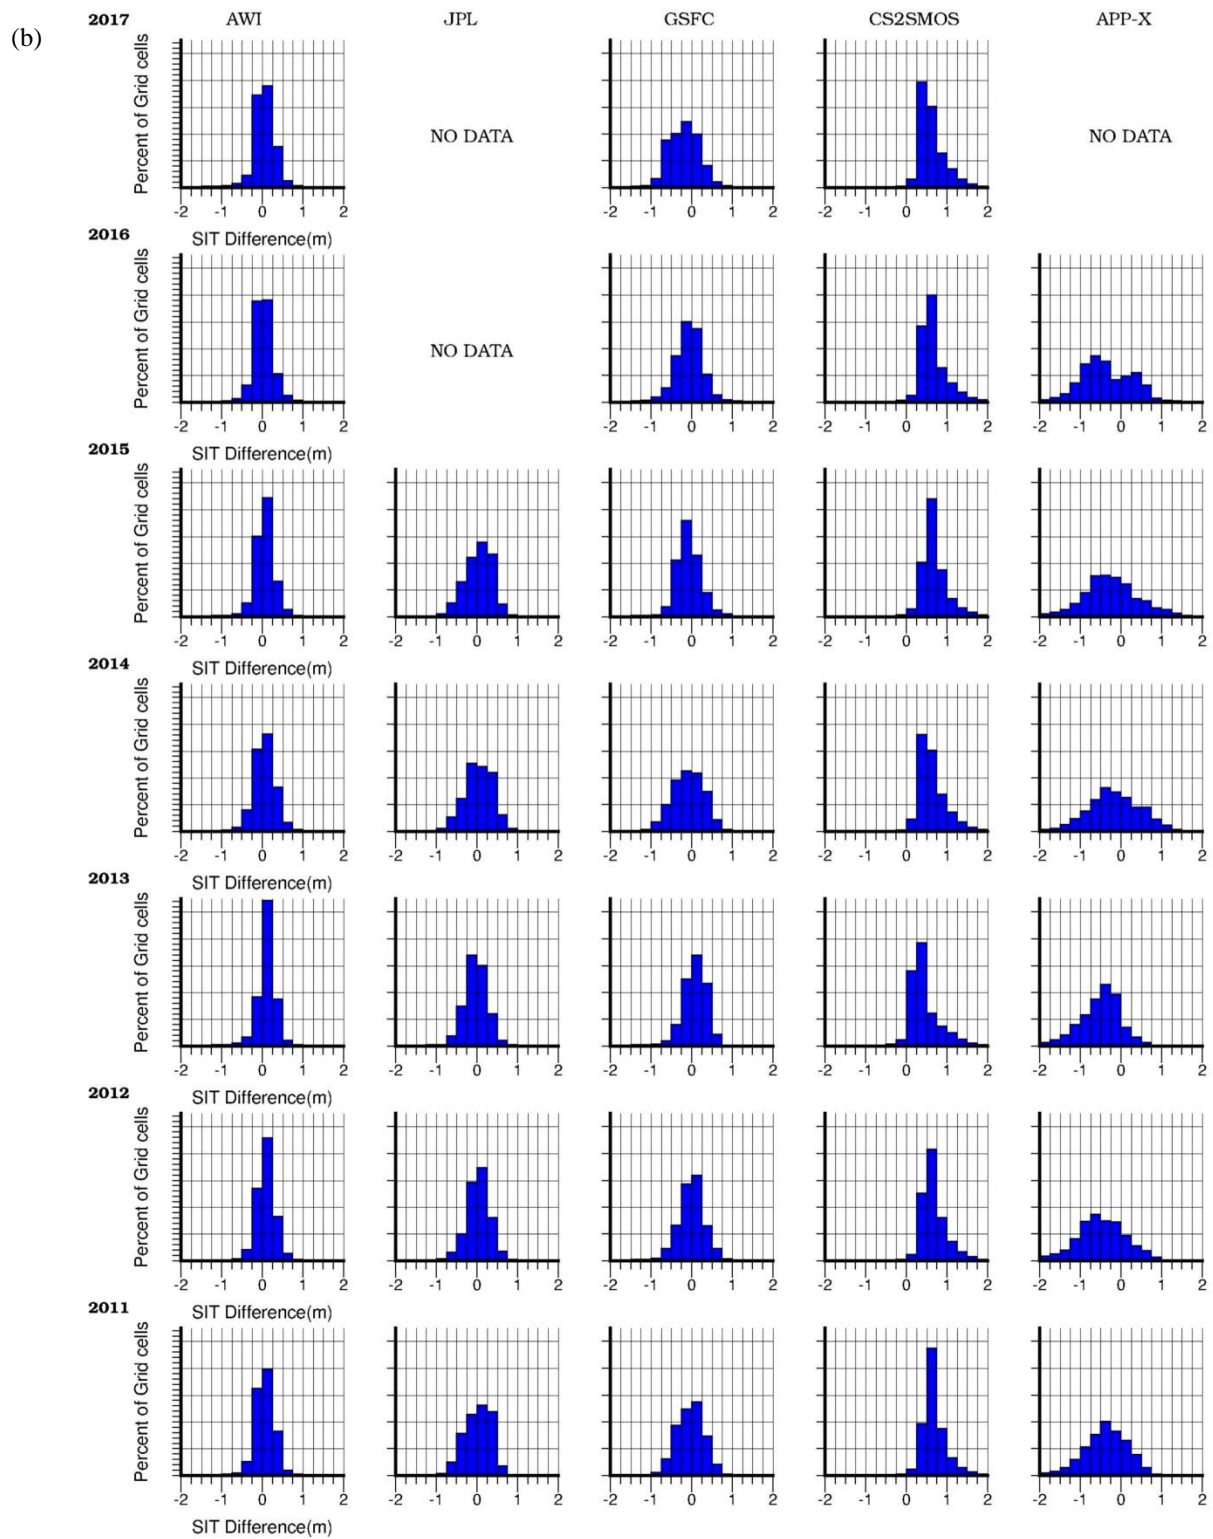

**Figure S1: Sea ice thickness deviation (in meters) for each product subtracted from reference data set (CPOM), for (a) October–November, and (b) March–April, in the central Arctic (regions 1–6), for the period 2011–2017.**

5

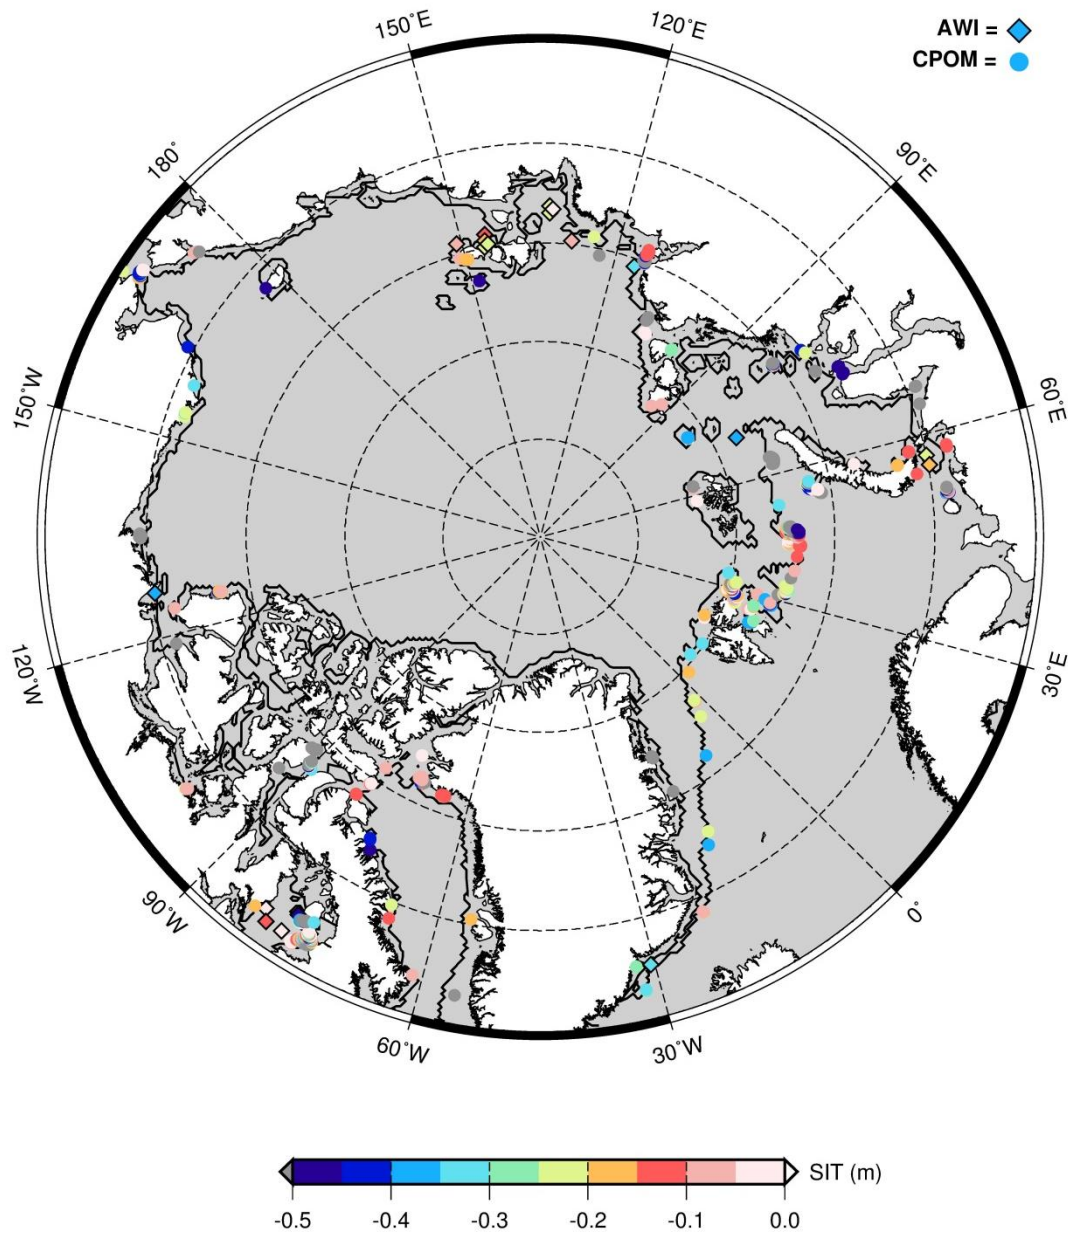

5 **Figure S2: Locations of negative sea ice thickness values in the CPOM (circles) and AWI (diamonds with black outline) data products, for March–April 2014 (CPOM) and April 2014 (AWI). A contour representing the 70 % ice concentration level is also shown (thick black line).**
